# Supplementary material for: Carbon dots isolated from chromatographic fractions for sensing applications
Source: Royal Society of Chemistry journal article supplement (doi:10.1039/c5ra21137a), 2015-01-01
Supplement: c5ra21137a1.pdf [file c5ra21137a1.pdf]

## Electronic Supplementary Information

### Carbon dots isolated from chromatographic fractions for sensing applications

Lizhen Liu,<sup>‡a,b</sup> Feng Feng,<sup>a,b\*</sup> Man Chin Paa,<sup>c</sup> Qin Hu,<sup>c</sup> Yang Liu,<sup>‡c</sup> Zezhong Chen,<sup>b</sup> Martin M. F. Choi<sup>c,1\*\*</sup>

<sup>a</sup>School of Chemistry and Materials Science, Shanxi Normal University, Linfen 041004, China. Fax: +86-352- 6100028; Tel: +86-352- 7157968; E-mail: feng-feng64@263.net

<sup>b</sup>College of Chemistry and Chemical Engineering, Shanxi Datong University, Datong 037009, China.

<sup>c</sup>Partner State Key Laboratory of Environmental and Biological Analysis, and Department of Chemistry, Hong Kong Baptist University, 224 Waterloo Road, Kowloon Tong, Hong Kong SAR, China. Fax: +852-34117348; E-mail: mmfchoi@gmail.com

<sup>1</sup>Present address: Acadia Divinity College, Acadia University, 15 University Avenue, Wolfville, Nova Scotia, B4P 2R6, Canada.

<sup>‡</sup>Exchange student on visit to Hong Kong Baptist University.

### Measurement of quantum yield

The quantum yield ( $\Phi_S$ ) of the C-dots sample was determined by a comparative method. Quinine sulfate ( $\Phi_R = 0.54$ ) in 0.10 M H<sub>2</sub>SO<sub>4</sub> (refractive index,  $\eta = 1.33$ ) was selected as the reference to determine the  $\Phi_S$  of the C-dots sample in methanol ( $\eta = 1.44$ ) and C-dots HPLC fractions in distilled water ( $\eta = 1.33$ ) at different concentrations. All the absorbances of the solutions at the excitation wavelength ( $\lambda_{ex}$ ) were recorded by a UV-vis absorption spectrophotometer (Varian, Palo Alto, CA, USA). Photoluminescence (PL) spectra of C-dots were measured by a Hitachi F-2500 spectrofluorometer (Tokyo, Japan). The  $\lambda_{ex}$ /integrated PL intensity areas under the PL curve in the wavelength range were 370/390–650 nm for C-dots sample and 350/370–650 nm for C-dots HPLC fractions. Graphs of integrated PL intensity against absorbance were plotted. The  $\Phi_S$  of the C-dots sample was calculated as follows:

$$\Phi_S = \Phi_R (Grad_S / Grad_R) (\eta^2_S / \eta^2_R)$$

where the subscripts *S* and *R* refer to the sample C-dots and reference, respectively. *Grad* is the gradient from the plot of integrated PL intensity against absorbance, and  $\eta$  is the refractive index of the solvent. In order to minimise the self-absorption effect, the absorbance in the 10-mm path-length fluorescence cuvette was kept under 0.10 at the  $\lambda_{ex}$ .<sup>1,2</sup>

### References

- 1 Y. Yang, J. Cui, M. Zheng, C. Hu, S. Tan, Y. Xiao, Q. Yang and Y. Liu, *Chem. Commun.*, 2012, **48**, 380.
- 2 X. Zhai, P. Zhang, C. Liu, T. Bai, W. Li, L. Da and W. Liu, *Chem. Commun.*, 2012, **48**, 7955.

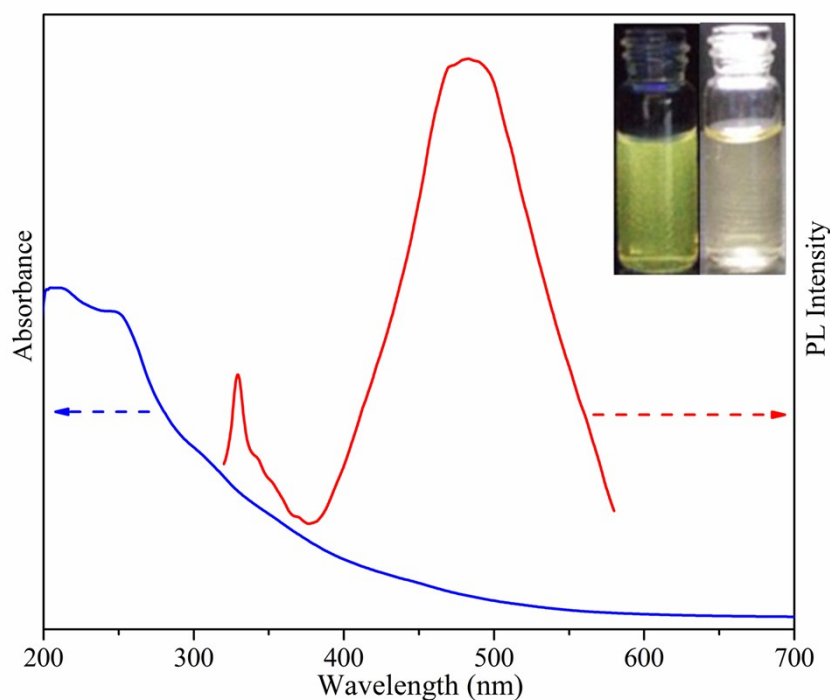

**Fig. S1.** UV-vis absorption (blue line) and PL spectra (red line,  $\lambda_{ex}$  300 nm) of the C-dots in methanol solution. Inset: the photographic images of the C-dots solution under daylight (right) and UV irradiation (365 nm, left).

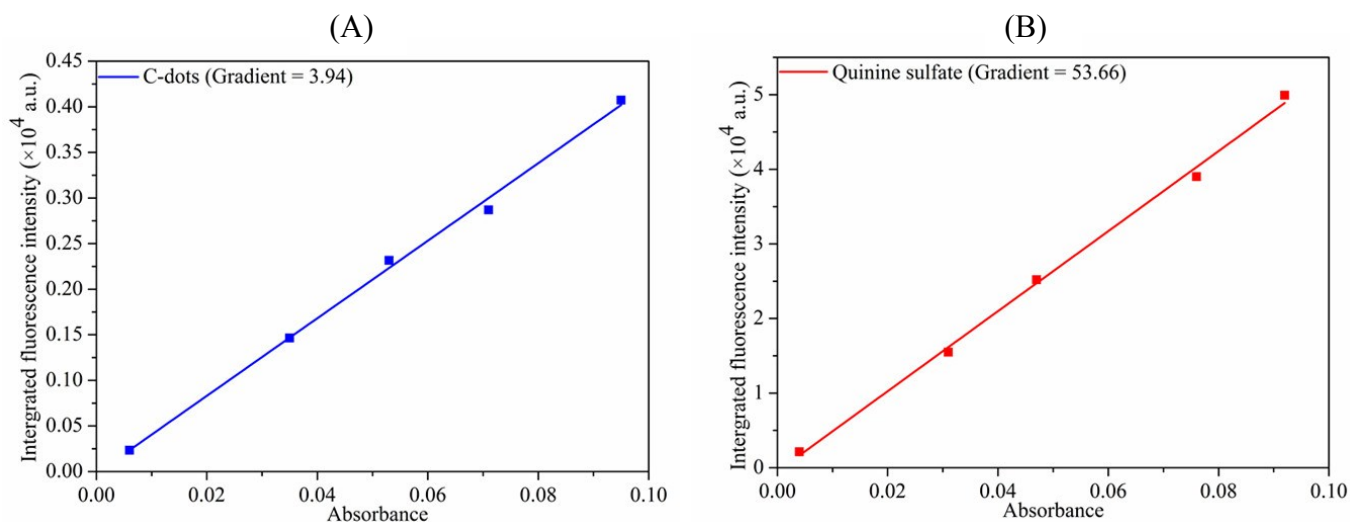

**Fig. S2.** Plots of integrated PL intensity against absorbance of (A) C-dots and (B) quinine sulfate.

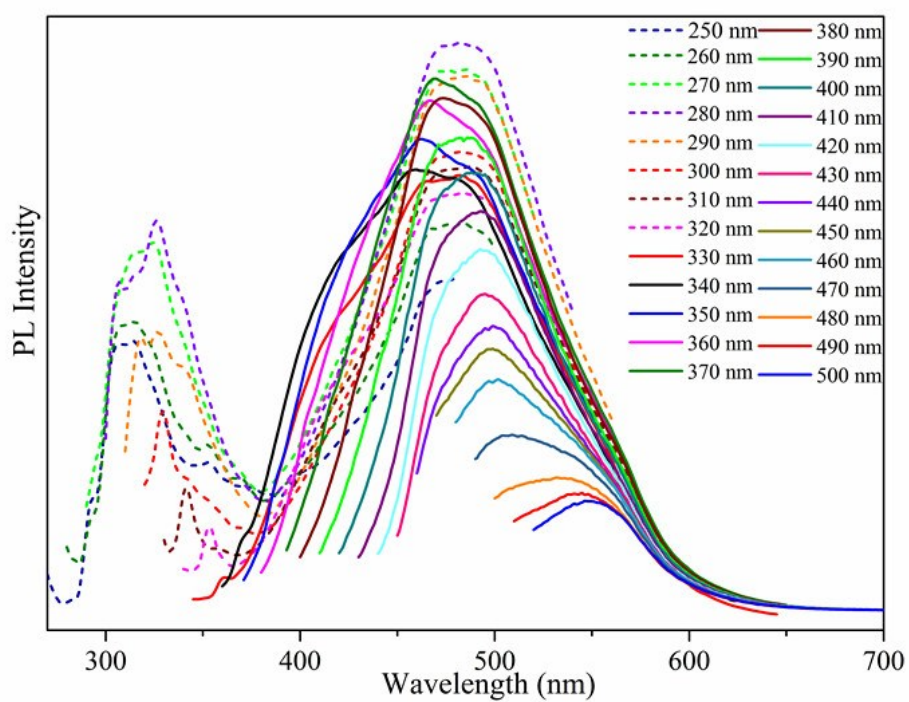

**Fig. S3.** PL spectra of C-dots at different  $\lambda_{ex}$  250–500 nm.

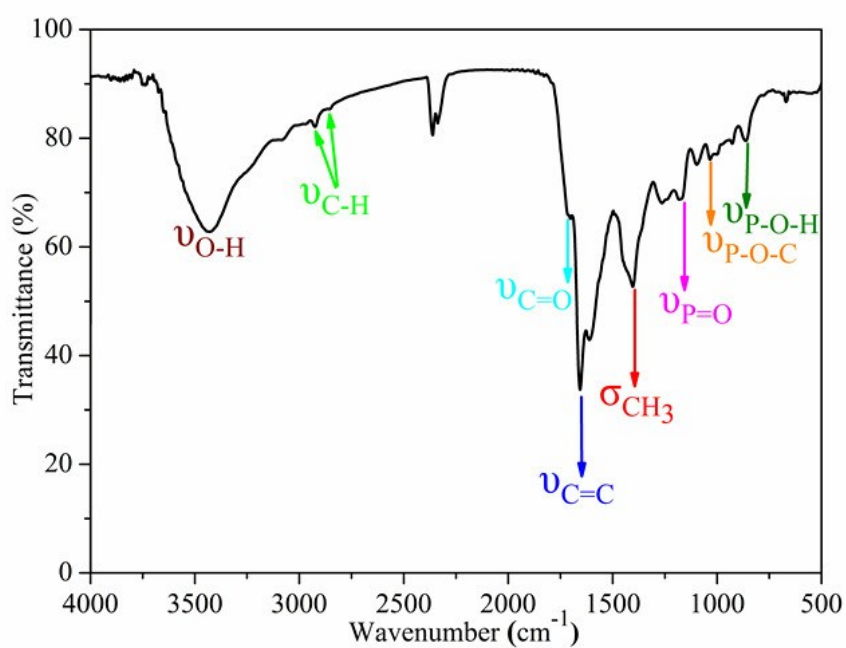

**Fig. S4.** IR spectrum of C-dots.

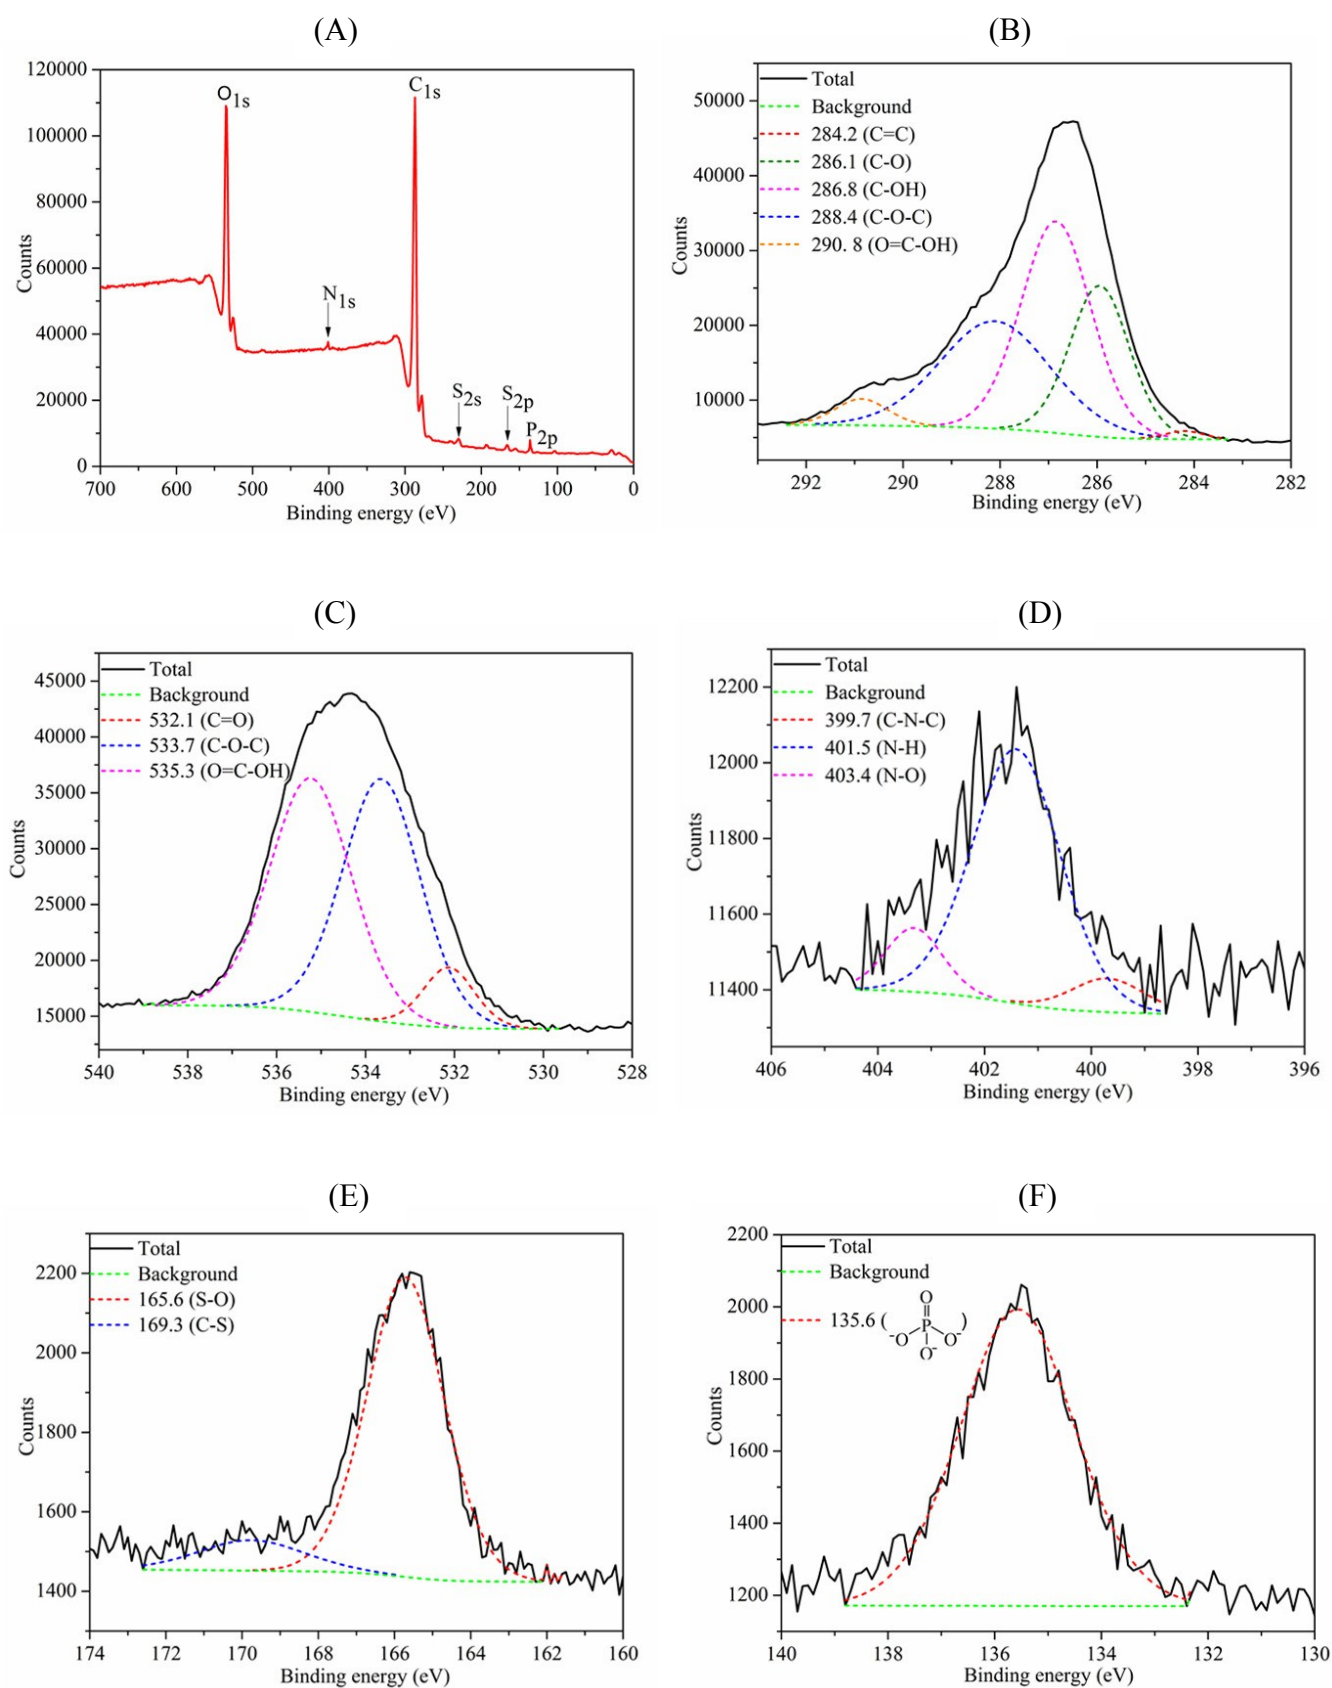

**Fig. S5.** (A) XPS survey scan, (B) C<sub>1s</sub>, (C) O<sub>1s</sub>, (D) N<sub>1s</sub>, (E) S<sub>2p</sub> and (F) P<sub>2p</sub> XPS spectra of C-dots.

**Table S1.** Elemental analysis of the C-dots samples synthesised with different mole ratios of NAC/HAc (0.00–0.025) in the initial reagents.

| Sample prepared from<br>mole ratio of NAC/HAc | Element Content (%) |      |      |                |      |      |
|-----------------------------------------------|---------------------|------|------|----------------|------|------|
|                                               | C                   | H    | P    | O (calculated) | N    | S    |
| 0.00                                          | 61.14               | 3.94 | 2.81 | 32.11          | –    | –    |
| 0.0050                                        | 60.53               | 4.05 | 2.69 | 31.64          | 0.29 | 0.80 |
| 0.0070                                        | 60.36               | 4.09 | 2.57 | 31.47          | 0.35 | 1.16 |
| 0.010                                         | 60.24               | 4.14 | 2.41 | 31.40          | 0.44 | 1.37 |
| 0.015                                         | 60.09               | 4.19 | 2.29 | 31.29          | 0.53 | 1.61 |
| 0.025                                         | 59.84               | 4.25 | 2.15 | 31.18          | 0.64 | 1.94 |

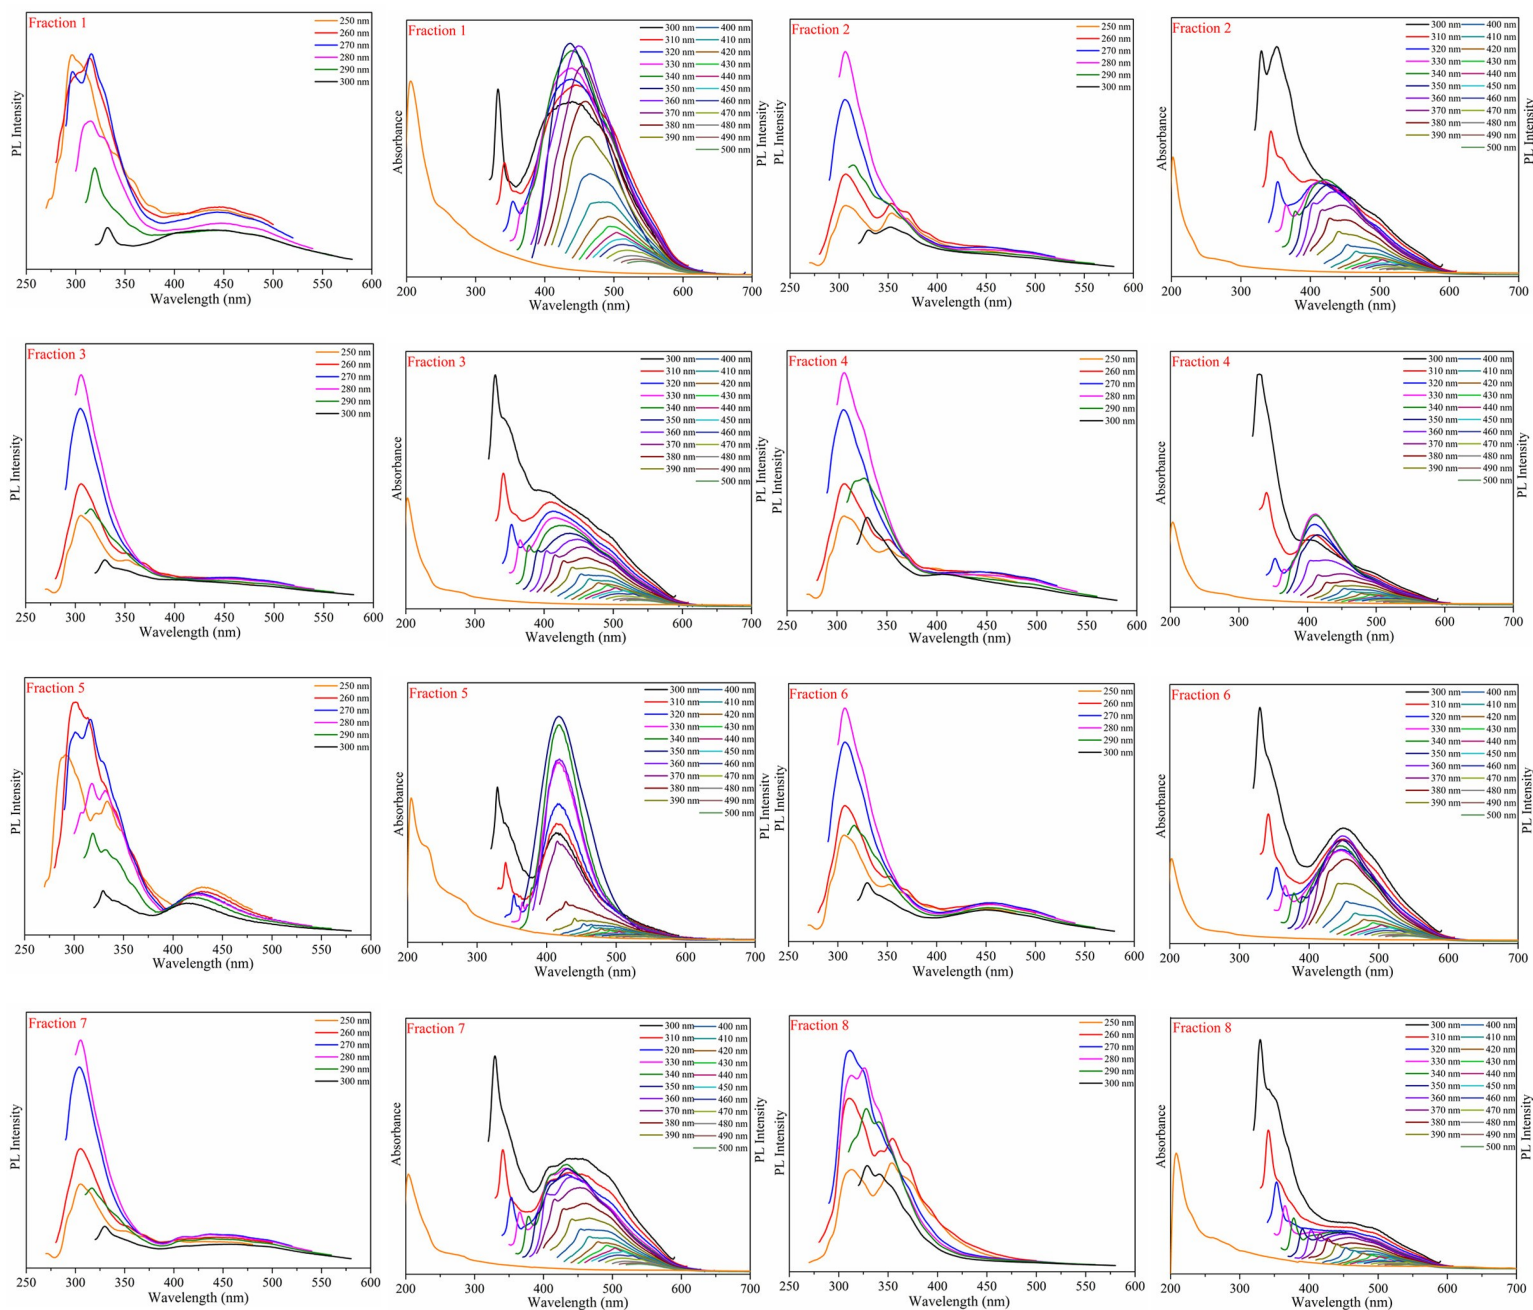

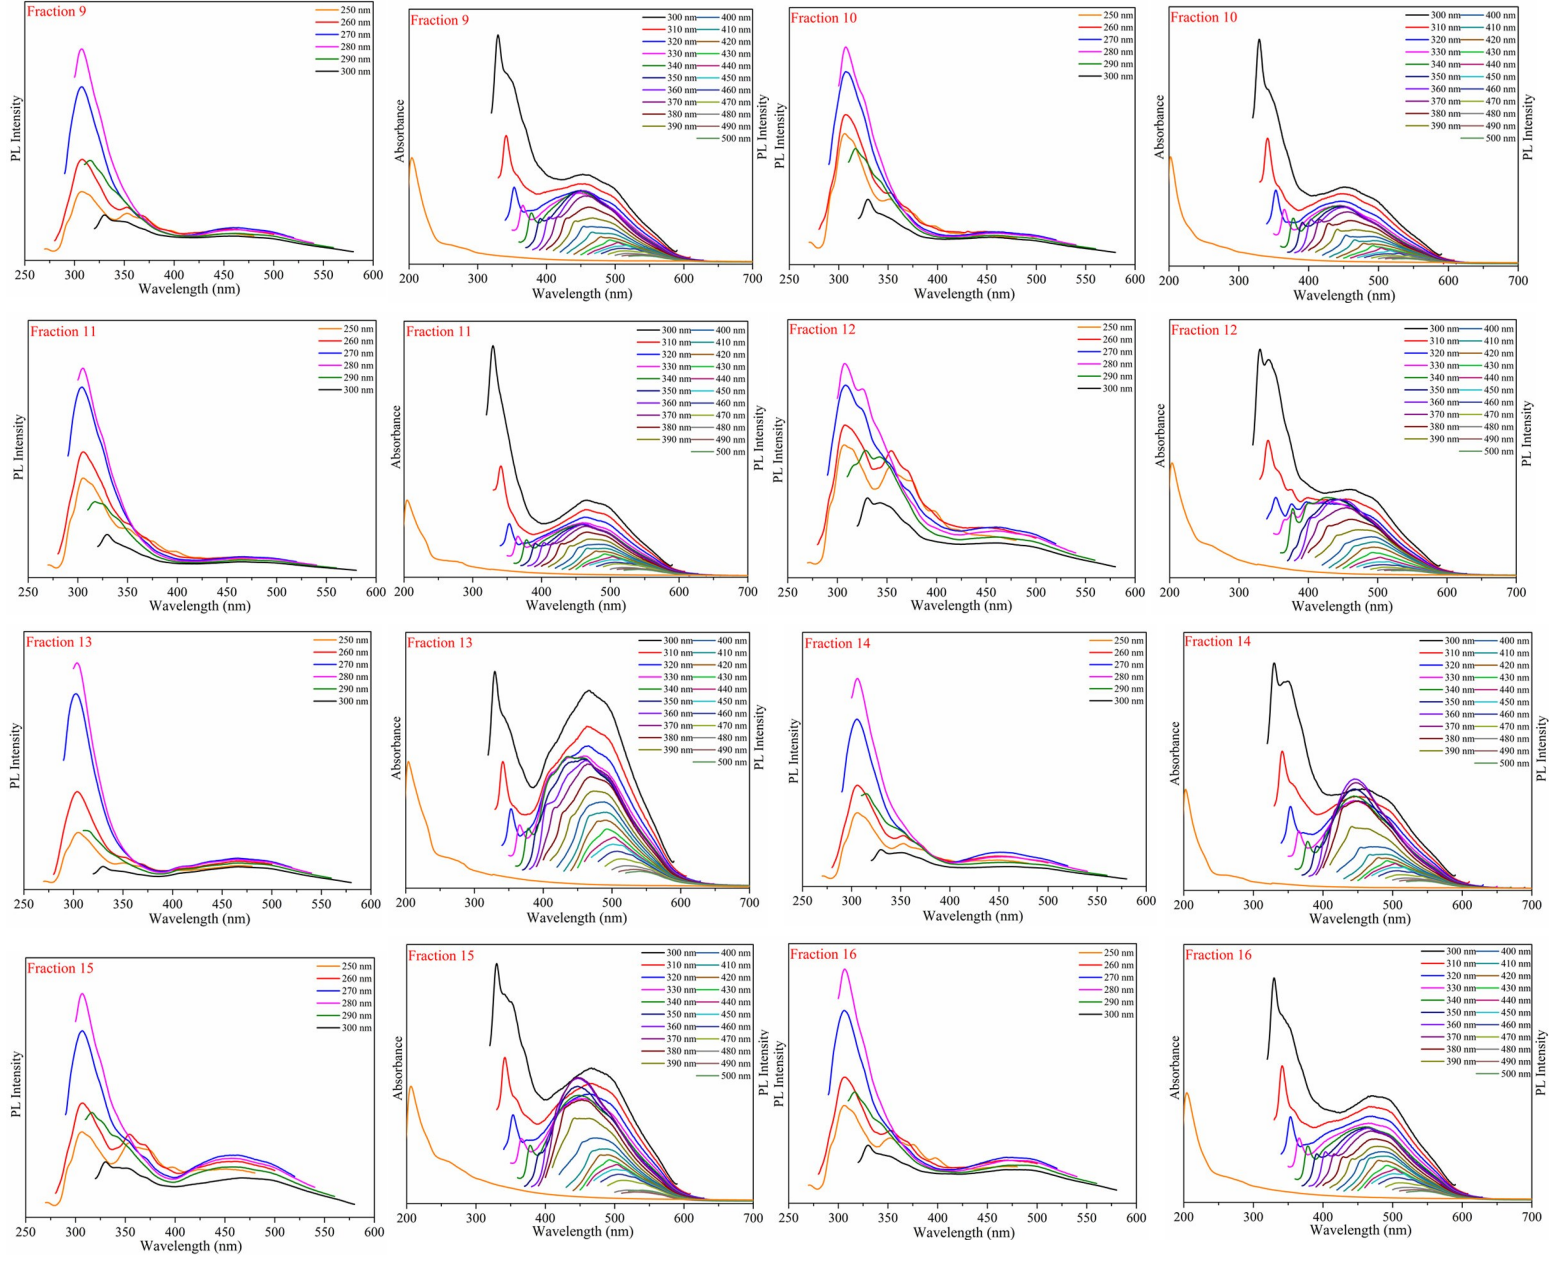

**Fig. S6.** UV-vis absorption and PL spectra at different  $\lambda_{ex}$  of fractions 1–16.

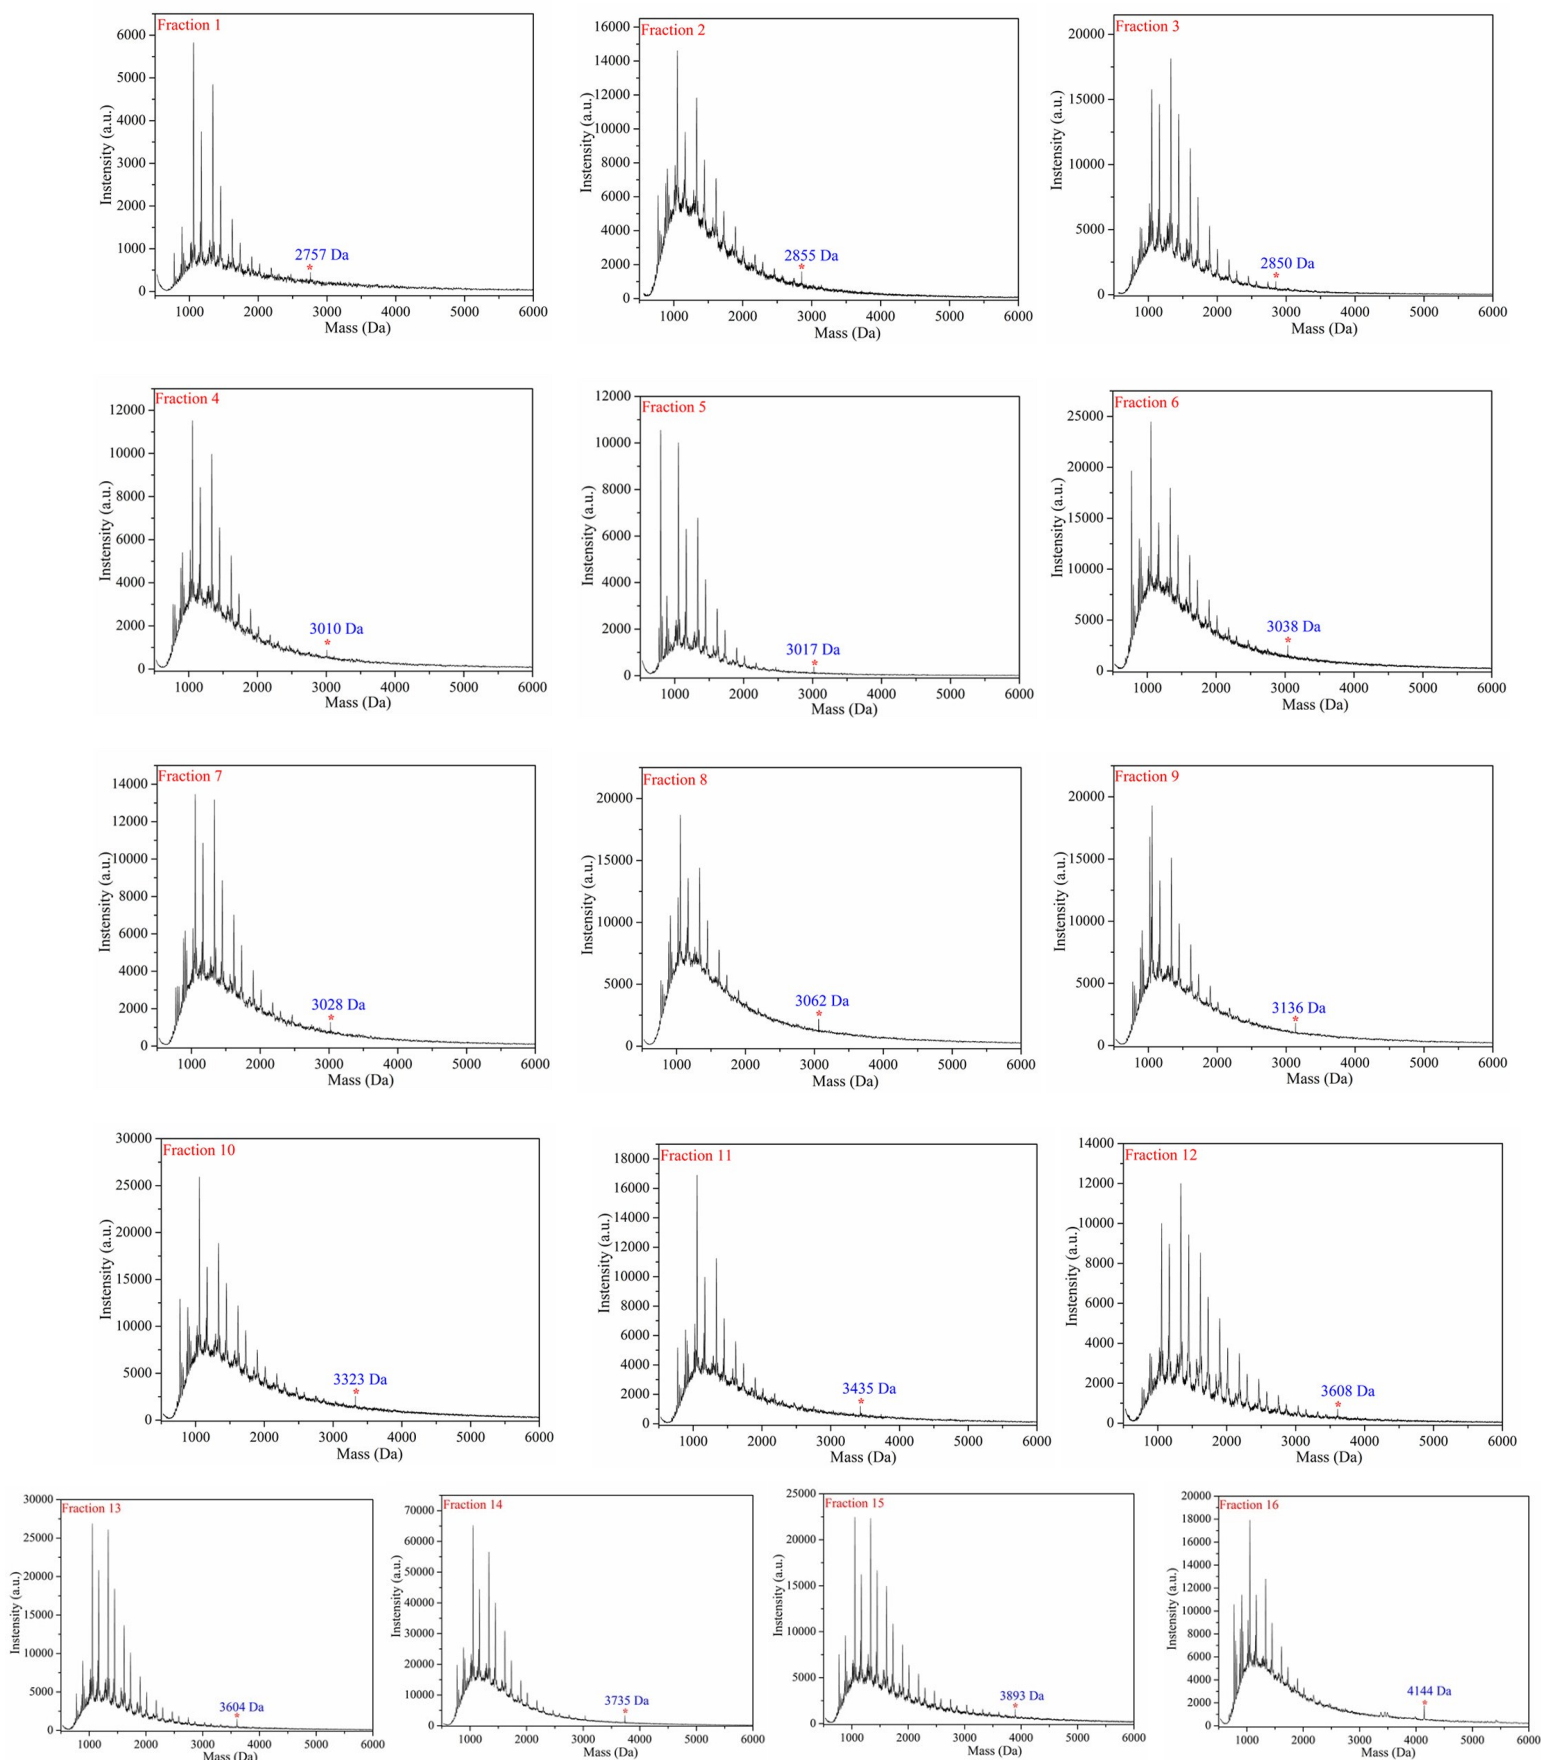

**Fig. S7.** MALDI-TOF mass spectra of fractions 1–16.

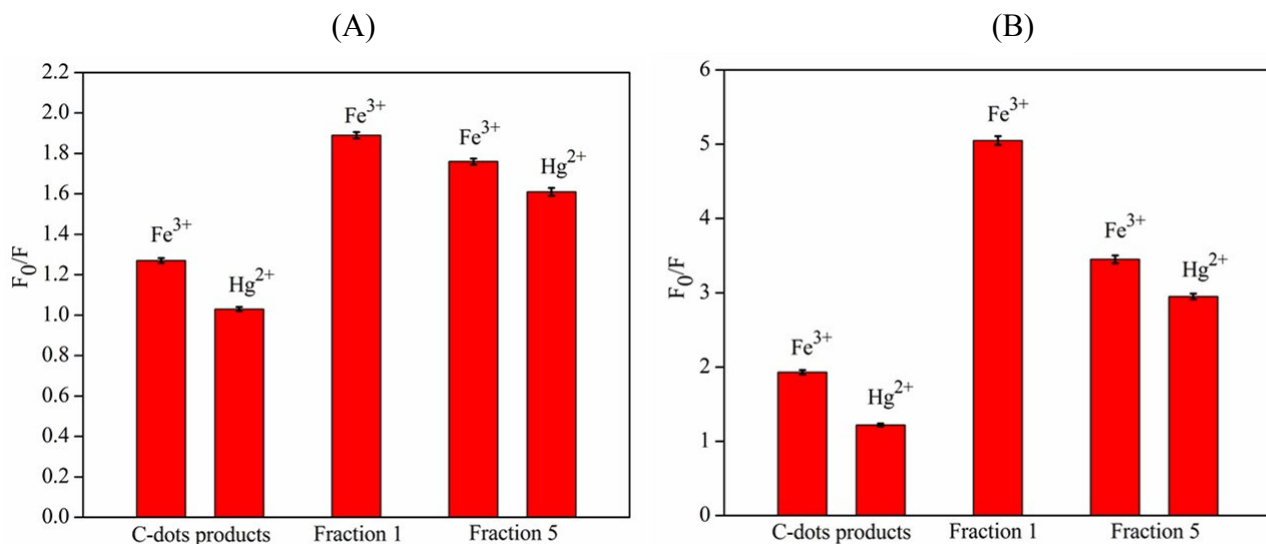

**Fig. S8.** (A) PL intensity changes of the as-synthesised C-dots products and fractions 1 and 5 in the presence of  $4.0 \mu\text{M}$   $\text{Fe}^{3+}$  and  $1.0 \mu\text{M}$   $\text{Hg}^{2+}$ . (B) PL intensity changes of the as-synthesised C-dots products and fractions 1 and 5 in the presence of  $60 \mu\text{M}$   $\text{Fe}^{3+}$  and  $20 \mu\text{M}$   $\text{Hg}^{2+}$ .  $F_0$  and  $F$  are the PL intensities of the as-synthesised C-dots products at  $\lambda_{\text{ex}}/\lambda_{\text{em}}$  of 370/480 nm, fraction 1 at  $\lambda_{\text{ex}}/\lambda_{\text{em}}$  of 350/436 nm and fraction 5 at  $\lambda_{\text{ex}}/\lambda_{\text{em}}$  of 350/420 nm in the absence and presence of  $\text{Fe}^{3+}$  and  $\text{Hg}^{2+}$ , respectively. Each data point is the average of three measurements. The error bars indicate the standard deviation of the measurements.
